# Supplementary material for: Application of boehmite as a fiber coating for headspace solid-phase microextraction of chlorophenols from aqueous samples
Source: Royal Society of Chemistry journal article supplement (doi:10.1039/d3ay01421e), 2023-01-01
Supplement: d3ay01421e1.pdf [file d3ay01421e1.pdf]

Supporting information

**For**

**Application of boehmite as a fiber coating for headspace solid-phase  
microextraction of chlorophenols from aqueous samples**

Mohammad Saraji\*, Monir Fouladi, Gholamhossein Mohammadnezhad, Narges Mehrafza

*Department of Chemistry, Isfahan University of Technology, Isfahan 84156-83111, Iran.*

\*Correspondence:

Mohammad Saraji, Department of Chemistry, Isfahan University of Technology, Isfahan  
84156-83111, Iran

E-mail: saraji@cc.iut.ac.ir, msaraji@ymail.com

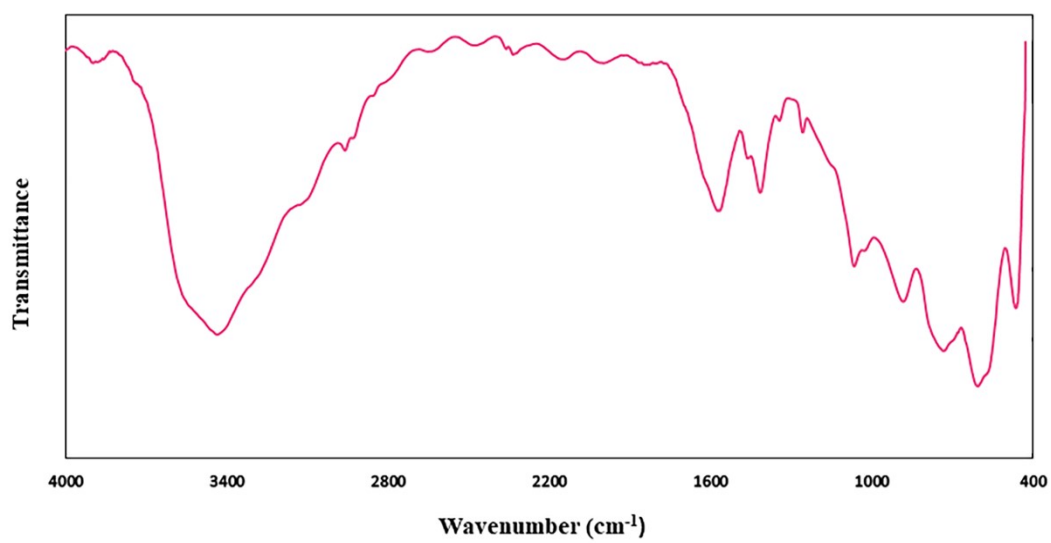

**Fig. S1** FT-IR spectrum of the boehmite

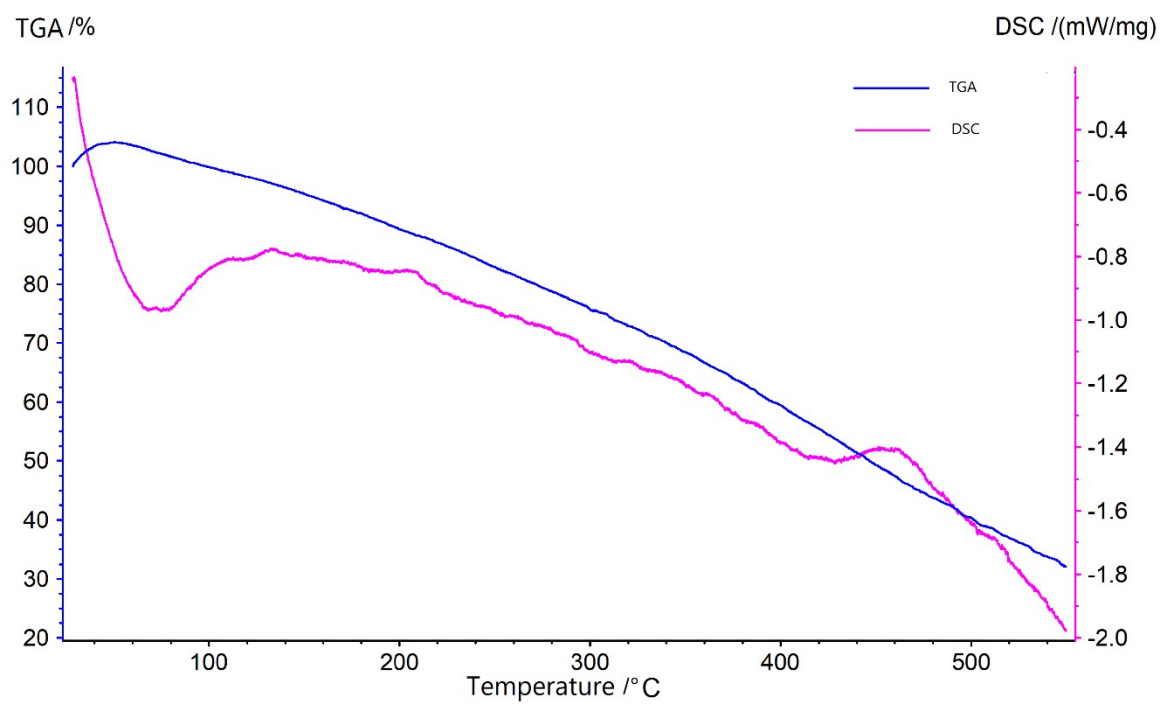

**Fig. S2** TGA and DSC of the boehmite

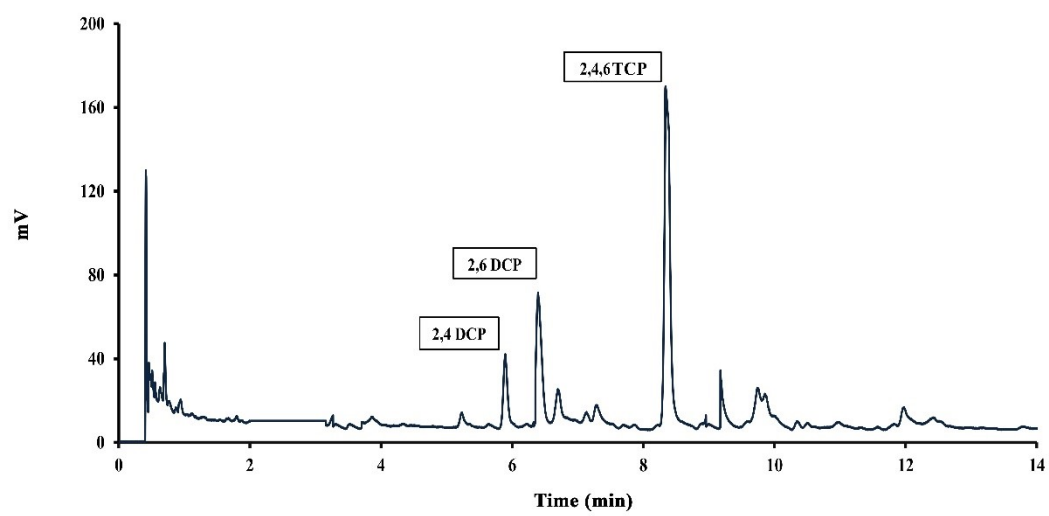

**Fig. S3** Chromatogram of Chlorophenols at LOQ concentration level
